# Supplementary material for: Lead acetate precursor based p-i-n perovskite solar cells with enhanced reproducibility and low hysteresis
Source: Royal Society of Chemistry journal article supplement (doi:10.1039/c5ta03169a), 2015-01-01
Supplement: c5ta03169a1.pdf [file c5ta03169a1.pdf]

## Electronic Supplementary Information

### **Lead acetate precursor based p-i-n perovskite solar cells with enhanced reproducibility and low hysteresis**

Dávid Forgács, Michele Sessolo and Henk J. Bolink\*

Instituto de Ciencia Molecular (ICMOL), Universidad de Valencia, 46980 Paterna, Valencia, Spain

\*To whom all correspondence should be addressed: Email: henk.bolink@uv.es

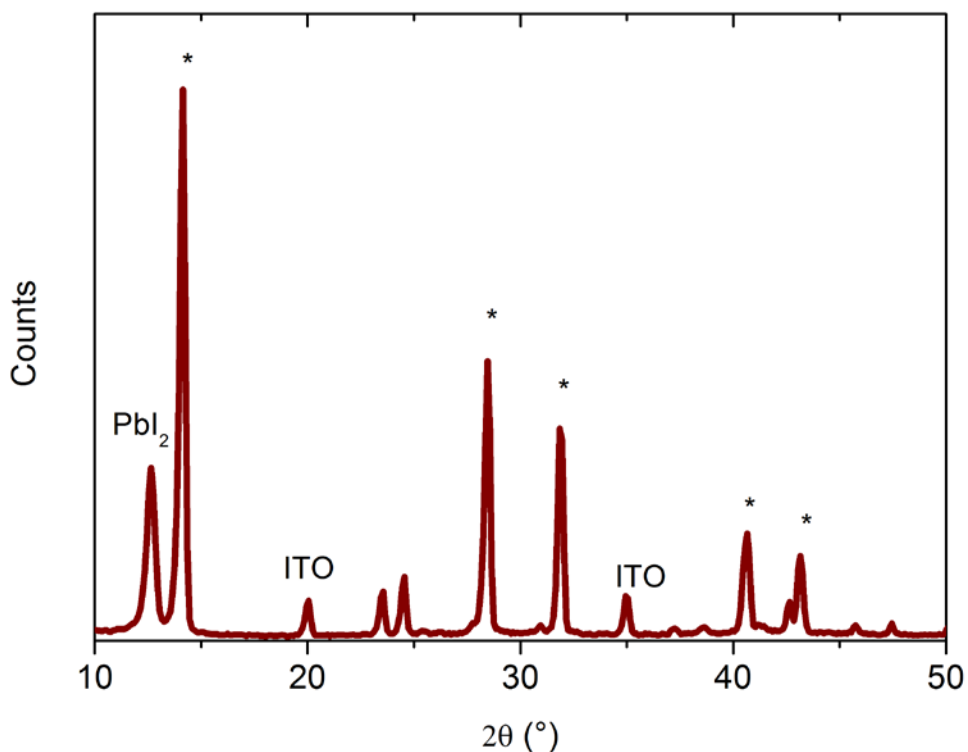

**Figure S1.** GIXRD spectra of an unencapsulated perovskite thin film on ITO/PEDOT, measured in the presence of air over 10 hours. The peak associated with PbI<sub>2</sub> is shown. This indicates the degradation of the perovskite in the presence of oxygen and moisture.

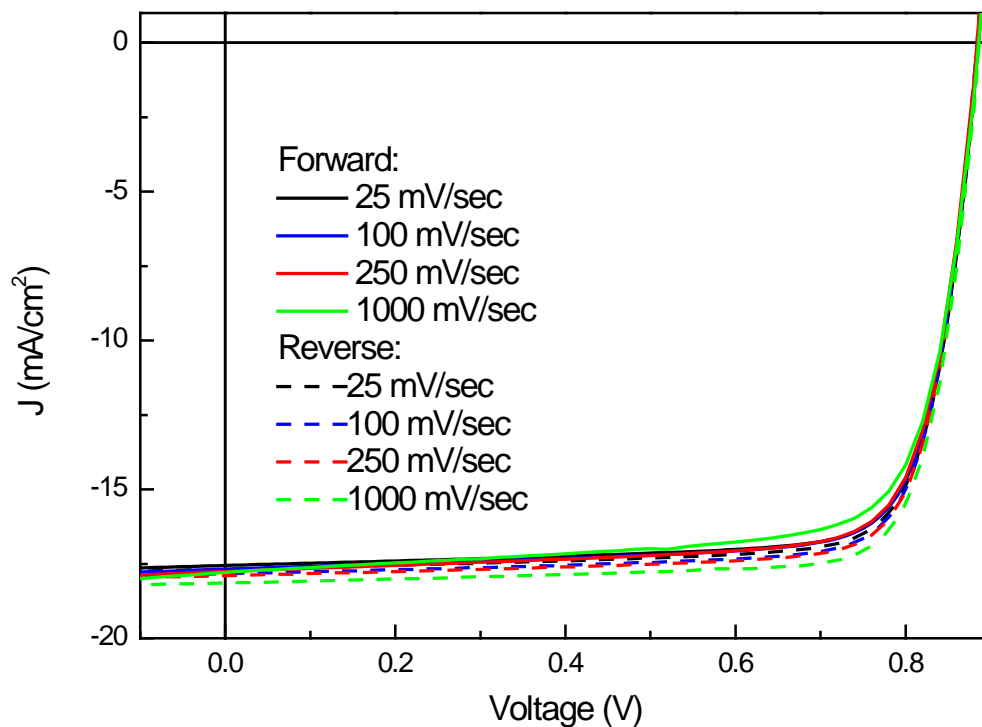

**Figure S2.** J-V curves recorded at different scanning speeds. It is visible, that lower scanning speeds result in a less pronounced hysteresis. Faster scans reduce the FF in forward measurement and increase the  $J_{sc}$  in reverse. The difference however is much smaller than what is observed in solar cells with n-i-p structures on metal oxides.
